# Supplementary material
Source: PubMed Central journal article supplement (PMC2857444)
Supplement: Supp_Data.pdf [file Supp_Data.pdf]

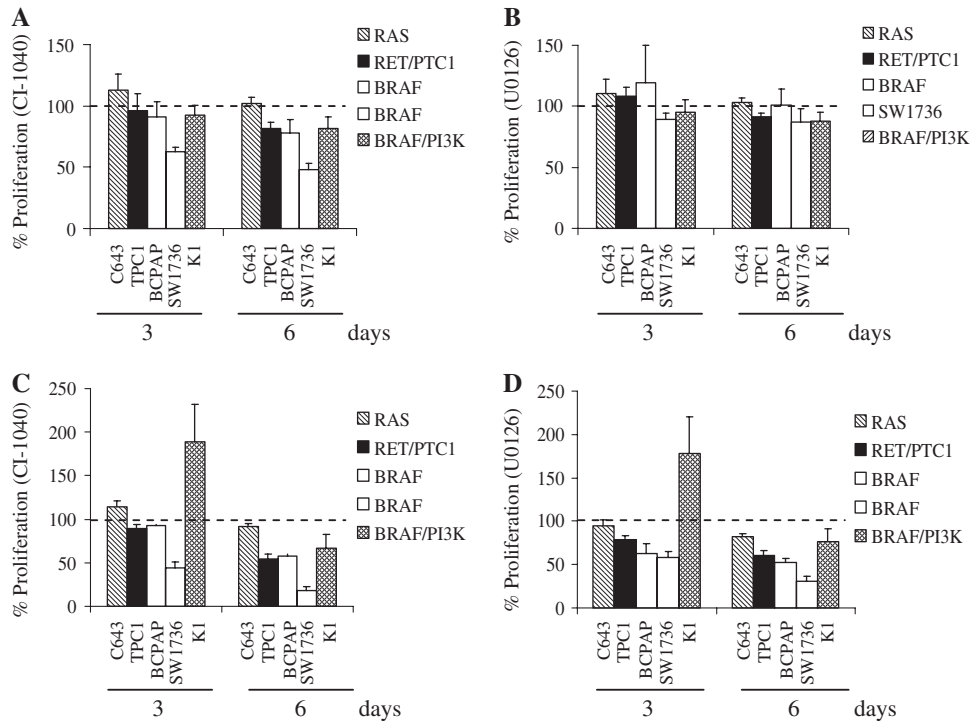

**SUPPLEMENTAL FIG. S1. Inhibition of proliferation of thyroid cancer cells by CI-1040 or U0126.** Cells (C643, TPC1, BCPAP, SW736, and K1) were grown in RPMI supplemented with 10% FBS (A, B) or 2% FBS (C, D) and treated with or without CI-1040 (0.5  $\mu$ M) (A, C) or U0126 (3  $\mu$ M) (B, D) for 3 and 6 days. Inhibitors and culture media were replenished every 72 hours. Cell proliferation was measured using the MTS assay (Promega), as described in "Materials and Methods". Vehicle/control was set to 100% and is represented by the dashed line. Results presented are the S.D. (A, B) or S.E.M. (C, D) from four to eight separate experiments done in quadruplicate. Statistical analysis (two-tailed *t*-test) indicated that at 6 days, the TPC1 and K1 ( $p = 0.03$ ), and SW1736 cells ( $p < 0.0001$ ) were significantly inhibited by CI-1040; and the TPC1 and K1 cells ( $p < 0.05$ ) were significantly inhibited by U0126 treatment when grown in RPMI/10% FBS (A, B). When grown in RPMI/2% FBS, the growth of the TPC1 and BCPAP ( $p < 0.02$ ) and SW1736 cells ( $p < 0.0001$ ) was significantly inhibited by CI-1040; and the growth of the C643 ( $p = 0.04$ ), TPC1 and BCPAP ( $p < 0.01$ ), and SW1736 ( $p < 0.0001$ ) was significantly inhibited by U0126.
